# Supplementary material for: Visual kinetic analysis
Source: Royal Society of Chemistry journal article supplement (doi:10.1039/c8sc04698k), 2018-12-13
Supplement: c8sc04698k1.xlsx [file c8sc04698k1.xlsx]

## Sheet: reaction conditions (same exce)
				k1=	1 M-1 s-1
				k2=	0.01 s-1
				k-2=	6 M-1 s-1
Experiment 1		Experiment 2		Experiment 3
[A]o	1.5 M	[A]o	1.0 M	[A]o	1.0 M
[B]o	1.3 M	[B]o	0.8 M	[B]o	0.8 M
[P]o	0.0 M	[P]o	0.0 M	[P]o	0.5 M
[cat]o	0.01 M	[cat]o	0.01 M	[cat]o	0.01 M

## Sheet: cat. deact.; prod. inhib.
		[A]o	1.5 M			[A]o	1.0 M				[A]o	1.0 M
		[B]o	1.3 M			[B]o	0.8 M				[B]o	0.8 M
		[P]o	0.0 M			[P]o	0.0 M				[P]o	0.5 M
		[cat]o	0.01 M			[cat]o	0.01 M				[cat]o	0.01 M
		Experiment 1				Experiment 2					Experiment 3
time-shift	0	t (h)	[A] (M)	[B] (M)	[P] (M)	t (h)	shifted time (h)	[A] (M)	[B] (M)	[P] (M)	t (h)	shifted time (h)	[A] (M)	[B] (M)	[P] (M)
time-shift with product added	0	0	1.5	1.3	0	0	0	1	0.8	0	0	0	1	0.8	0.5
		1.67	1.138	0.948	0.352	3.33	3.33	0.672	0.482	0.318	6.67	6.67	0.718	0.528	0.772
		3.33	0.987	0.797	0.503	10	10	0.498	0.308	0.492	13.33	13.33	0.592	0.402	0.898
		6.67	0.816	0.626	0.673	16.67	16.67	0.419	0.229	0.571	20	20	0.514	0.324	0.976
		13.33	0.643	0.453	0.847	23.33	23.33	0.37	0.18	0.62	26.67	26.67	0.461	0.271	1.029
		20	0.547	0.357	0.943	30	30	0.337	0.147	0.653	33.33	33.33	0.422	0.232	1.068
		26.67	0.484	0.294	1.006	36.67	36.67	0.313	0.123	0.677	40	40	0.391	0.201	1.099
		33.33	0.439	0.249	1.051	43.33	43.33	0.294	0.104	0.696	46.67	46.67	0.367	0.177	1.123
		40	0.405	0.215	1.085	50	50	0.28	0.09	0.71
		46.67	0.378	0.188	1.112
		53.33	0.356	0.166	1.134

## Sheet: reaction conditions
				k1=	1 M-1 s-1
				k-1=	100 s-1
				k2=	1 M-1 s-1
Experiment 1		Experiment 2		Experiment 3		Experiment 4
[A]o	1.0 M	[A]o	0.6 M	[A]o	1.0 M	[A]o	1.0 M
[B]o	0.6 M	[B]o	0.6 M	[B]o	0.8 M	[B]o	0.6 M
[cat]o	0.01 M	[cat]o	0.01 M	[cat]o	0.01 M	[cat]o	0.03 M

## Sheet: order in A (P)
		[A]o	1.0 M			[A]o	0.6 M
		[B]o	0.6 M			[B]o	0.6 M
		[cat]o	0.01 M			[cat]o	0.01 M
		Experiment 1				Experiment 2
order in A	0	t (h)	tA	[A] (M)	[P] (M)	t (h)	tA	[A] (M)	[P] (M)
		0	0	1	0	0	0	0.6	0
		0.89	0.89	0.849	0.151	0.67	0.67	0.525	0.075
		2.03	2.03	0.727	0.273	2.67	2.67	0.382	0.218
		3.89	3.89	0.61	0.389	5.67	5.67	0.271	0.329
		6.61	6.61	0.522	0.478	12.11	12.11	0.167	0.433
		10	10	0.467	0.533	19.11	19.11	0.117	0.483
		14.03	14.03	0.435	0.565	25.22	25.22	0.093	0.507
		18.36	18.36	0.418	0.582	46.89	46.89	0.054	0.546
		22.97	22.97	0.409	0.591	89.22	89.22	0.03	0.57
		27.78	27.78	0.405	0.595	111.11	111.11	0.024	0.576

## Sheet: order in A (B)
		[A]o	1.0 M			[A]o	0.6 M
		[B]o	0.6 M			[B]o	0.6 M
		[cat]o	0.01 M			[cat]o	0.01 M
		Experiment 1				Experiment 2
order in A	0	t (h)	tA	[A] (M)	[B] (M)	t (h)	tA	[A] (M)	[B] (M)
		0	0	1	0.6	0	0	0.6	0.6
		0.89	0.89	0.849	0.449	0.67	0.67	0.525	0.525
		2.03	2.03	0.727	0.327	2.67	2.67	0.382	0.382
		3.89	3.89	0.61	0.211	5.67	5.67	0.271	0.271
		6.61	6.61	0.522	0.122	12.11	12.11	0.167	0.167
		10	10	0.467	0.067	19.11	19.11	0.117	0.117
		14.03	14.03	0.435	0.035	25.22	25.22	0.093	0.093
		18.36	18.36	0.418	0.018	46.89	46.89	0.054	0.054
		22.97	22.97	0.409	0.009	89.22	89.22	0.03	0.03
		27.78	27.78	0.405	0.005	111.11	111.11	0.024	0.024

## Sheet: order in A (A)
		[A]o	1.0 M			[A]o	0.6 M
		[B]o	0.6 M			[B]o	0.6 M
		[cat]o	0.01 M			[cat]o	0.01 M
		Experiment 1				Experiment 2
order in A	0	t (h)	tA	[A] (M)	[A]-0.4 (M)	t (h)	tA	[A] (M)
		0	0	1	0.6	0	0	0.6
		0.89	0.89	0.849	0.449	0.67	0.67	0.525
		2.03	2.03	0.727	0.327	2.67	2.67	0.382
		3.89	3.89	0.61	0.21	5.67	5.67	0.271
		6.61	6.61	0.522	0.122	12.11	12.11	0.167
		10	10	0.467	0.067	19.11	19.11	0.117
		14.03	14.03	0.435	0.035	25.22	25.22	0.093
		18.36	18.36	0.418	0.018	46.89	46.89	0.054
		22.97	22.97	0.409	0.009	89.22	89.22	0.03
		27.78	27.78	0.405	0.005	111.11	111.11	0.024

## Sheet: order in B (P)
		[A]o	1.0 M			[A]o	1.0 M
		[B]o	0.6 M			[B]o	0.8 M
		[cat]o	0.01 M			[cat]o	0.01 M
		Experiment 1				Experiment 3
		t (h)	tB	[B] (M)	[P] (M)	t (h)	tB	[B] (M)	[P] (M)
order in B	0	0	0	0.6	0	0	0	0.8	0
		0.89	0.89	0.449	0.151	0.33	0.33	0.715	0.085
		2.03	2.03	0.327	0.273	1	1	0.585	0.215
		3.89	3.89	0.211	0.389	1.92	1.92	0.462	0.338
		6.61	6.61	0.122	0.478	3.08	3.08	0.36	0.44
		10	10	0.067	0.533	4.38	4.38	0.283	0.517
		14.03	14.03	0.035	0.565	6.29	6.29	0.209	0.591
		18.36	18.36	0.018	0.582	11.54	11.54	0.108	0.692
		22.97	22.97	0.009	0.591	22.92	22.92	0.037	0.763
		27.78	27.78	0.005	0.595	41.67	41.67	0.008	0.792

## Sheet: order in B (A)
		[A]o	1.0 M			[A]o	1.0 M
		[B]o	0.6 M			[B]o	0.8 M
		[cat]o	0.01 M			[cat]o	0.01 M
		Experiment 1				Experiment 3
		t (h)	tB	[A] (M)	[B] (M)	t (h)	tB	[A] (M)	[B] (M)
order in B	0	0	0	1	0.6	0	0	1	0.8
		0.89	0.89	0.849	0.449	0.33	0.33	0.915	0.715
		2.03	2.03	0.727	0.327	1	1	0.785	0.585
		3.89	3.89	0.61	0.211	1.92	1.92	0.662	0.462
		6.61	6.61	0.522	0.122	3.08	3.08	0.56	0.36
		10	10	0.467	0.067	4.38	4.38	0.483	0.283
		14.03	14.03	0.435	0.035	6.29	6.29	0.409	0.209
		18.36	18.36	0.418	0.018	11.54	11.54	0.308	0.108
		22.97	22.97	0.409	0.009	22.92	22.92	0.237	0.037
		27.78	27.78	0.405	0.005	41.67	41.67	0.208	0.008

## Sheet: order in B (B)
		[A]o	1.0 M		[A]o	1.0 M
		[B]o	0.6 M		[B]o	0.8 M
		[cat]o	0.01 M		[cat]o	0.01 M
		Experiment 1			Experiment 3
		t (h)	tB	[B] (M)	t (h)	tB	[B] (M)	[B]-0.2 (M)
order in B	0	0	0	0.6	0	0	0.8	0.6
		0.89	0.89	0.449	0.33	0.33	0.715	0.515
		2.03	2.03	0.327	1	1	0.585	0.385
		3.89	3.89	0.211	1.92	1.92	0.462	0.262
		6.61	6.61	0.122	3.08	3.08	0.36	0.16
		10	10	0.067	4.38	4.38	0.283	0.083
		14.03	14.03	0.035	6.29	6.29	0.209	0.009
		18.36	18.36	0.018	11.54	11.54	0.108	-0.092
		22.97	22.97	0.009	22.92	22.92	0.037	-0.163
		27.78	27.78	0.005	41.67	41.67	0.008	-0.192

## Sheet: order in cat (P)
		[A]o	1.0 M			[A]o	1.0 M
		[B]o	0.6 M			[B]o	0.6 M
		[cat]o	0.01 M			[cat]o	0.03 M
		Experiment 1				Experiment 4
		t (h)	tcat	[P] (M)	[cat] (M)	t (h)	tcat	[P] (M)	[cat] (M)
		0	0	0	0.01	0	0	0	0.03
order in cat	0	0.89	0.89	0.151	0.01	0.13	0.13	0.075	0.03
		2.03	2.03	0.273	0.01	0.47	0.47	0.214	0.03
		3.89	3.89	0.389	0.01	0.93	0.93	0.329	0.03
		6.61	6.61	0.478	0.01	1.68	1.68	0.435	0.03
		10	10	0.533	0.01	2.85	2.85	0.514	0.03
		14.03	14.03	0.565	0.01	3.94	3.94	0.55	0.03
		18.36	18.36	0.582	0.01	5.5	5.5	0.576	0.03
		22.97	22.97	0.591	0.01	7	7	0.588	0.03
		27.78	27.78	0.595	0.01	8.33	8.33	0.593	0.03

[truncated: 5 more sheets: order in cat (A), order in cat (B), kobs (P), kobs (A), kobs (B)]
