# Supplementary material for: Visual kinetic analysis
Source: Royal Society of Chemistry journal article supplement (doi:10.1039/c8sc04698k), 2018-12-13
Supplement: c8sc04698k2.xlsx [file c8sc04698k2.xlsx]

## Sheet: reaction conditions (same exce)
				k1=	1 M-1 s-1
				k2=	0.01 s-1
				k-2=	6 M-1 s-1
Experiment 1		Experiment 2		Experiment 3
[A]o	1.5 M	[A]o	1.0 M	[A]o	1.0 M
[B]o	1.3 M	[B]o	0.8 M	[B]o	0.8 M
[P]o	0.0 M	[P]o	0.0 M	[P]o	0.5 M
[cat]o	0.01 M	[cat]o	0.01 M	[cat]o	0.01 M

## Sheet: cat. deact.; prod. inhib.
		[A]o	1.5 M				[A]o	1.0 M				[A]o	1.0 M
		[B]o	1.3 M				[B]o	0.8 M				[B]o	0.8 M
		[P]o	0.0 M				[P]o	0.0 M				[P]o	0.5 M
		[cat]o	0.01 M				[cat]o	0.01 M				[cat]o	0.01 M
		Experiment 1					Experiment 2					Experiment 3
		t (h)	A (M)	B (M)	P (M)	rate (M/h)	t (h)	[A] (M)	[B] (M)	[P] (M)	rate (M/h)	t (h)	[A] (M)	[B] (M)	[P] (M)	rate (M/h)
		0.08	1.456	1.266	0.034	0.396	0.08	0.968	0.778	0.022	0.245	0.07	0.993	0.803	0.497	0.072
		0.27	1.391	1.201	0.099	0.301	0.28	0.926	0.736	0.064	0.186	2.98	0.836	0.646	0.654	0.041
		0.58	1.311	1.121	0.179	0.221	0.7	0.862	0.672	0.128	0.127	8.65	0.672	0.482	0.818	0.021
		1.17	1.205	1.015	0.285	0.15	1.32	0.797	0.607	0.193	0.089	22.85	0.489	0.299	1.001	0.008
		2.4	1.062	0.872	0.428	0.092	2.85	0.695	0.505	0.295	0.051	82.12	0.291	0.101	1.199	0.001
		4.67	0.906	0.716	0.584	0.053	5.42	0.596	0.406	0.394	0.029
		8.62	0.752	0.562	0.738	0.029	9.98	0.498	0.308	0.492	0.016
		17.15	0.583	0.393	0.907	0.014	18.98	0.399	0.209	0.591	0.008
		38.93	0.41	0.22	1.08	0.005	40.97	0.3	0.11	0.69	0.003
		82.82	0.294	0.104	1.196	0.001

## Sheet: reaction conditions (orders)
				k1=	1 M-1 s-1
				k-1=	100 s-1
				k2=	1 M-1 s-1
Experiment 1		Experiment 2		Experiment 3		Experiment 4
[A]o	1.0 M	[A]o	0.6 M	[A]o	1.0 M	[A]o	1.0 M
[B]o	0.6 M	[B]o	0.6 M	[B]o	0.8 M	[B]o	0.6 M
[cat]o	0.01 M	[cat]o	0.01 M	[cat]o	0.01 M	[cat]o	0.03 M

## Sheet: order in A (red-green)
		[A]o	1.0 M				[A]o	0.6 M
		[B]o	0.6 M				[B]o	0.6 M
		[cat]o	0.01 M				[cat]o	0.01 M
		Experiment 1					Experiment 2
order in A	0	t (h)	[A] (M)	[B] (M)	rate (M/h)	rate/[A]α	t (h)	[A] (M)	[B] (M)	rate (M/h)	rate/[A]α
		0	1	0.6	0.212598	0.212598	0	0.6	0.6	0.128063	0.128063
		0.89	0.849	0.449	0.135	0.135	0.67	0.525	0.525	0.098	0.098
		2.03	0.727	0.327	0.085	0.085	2.67	0.382	0.382	0.052	0.052
		3.89	0.61	0.211	0.046	0.046	5.67	0.271	0.271	0.026	0.026
		6.61	0.522	0.122	0.023	0.023	12.11	0.167	0.167	0.01	0.01
		10	0.467	0.067	0.011	0.011	19.11	0.117	0.117	0.005	0.005
		14.03	0.435	0.035	0.005	0.005	25.22	0.093	0.093	0.003	0.003
		18.36	0.418	0.018	0.003	0.003	46.89	0.054	0.054	0.001	0.001
		22.97	0.409	0.009	0.001	0.001	89.22	0.03	0.03	0	0
		27.78	0.405	0.005	0.001	0.001	111.11	0.024	0.024	0	0

## Sheet: order in A (red-blue)
		[A]o	1.0 M				[A]o	1.0 M
		[B]o	0.6 M				[B]o	0.8 M
		[cat]o	0.01 M				[cat]o	0.01 M
		Experiment 1					Experiment 3
order in A	0	t (h)	[A] (M)	[B] (M)	rate (M/h)	rate/[A]α	t (h)	[A] (M)	[B] (M)	rate (M/h)	rate/[A]α
		0	1	0.6	0.212598	0.212598	0	1	0.8	0.282908	0.282908
		0.89	0.849	0.449	0.135	0.135	0.33	0.915	0.715	0.232	0.232
		2.03	0.727	0.327	0.085	0.085	1	0.785	0.585	0.163	0.163
		3.89	0.61	0.211	0.046	0.046	1.92	0.662	0.462	0.109	0.109
		6.61	0.522	0.122	0.023	0.023	3.08	0.56	0.36	0.072	0.072
		10	0.467	0.067	0.011	0.011	4.38	0.483	0.283	0.049	0.049
		14.03	0.435	0.035	0.005	0.005	6.29	0.409	0.209	0.031	0.031
		18.36	0.418	0.018	0.003	0.003	11.54	0.308	0.108	0.012	0.012
		22.97	0.409	0.009	0.001	0.001	22.92	0.237	0.037	0.003	0.003
		27.78	0.405	0.005	0.001	0.001	41.67	0.208	0.008	0.001	0.001

## Sheet: order in B (red-blue)
		[A]o	1.0 M				[A]o	1.0 M
		[B]o	0.6 M				[B]o	0.8 M
		[cat]o	0.01 M				[cat]o	0.01 M
		Experiment 1					Experiment 3
		t (h)	[A] (M)	[B] (M)	rate (M/h)	rate/[B]β	t (h)	[A] (M)	[B] (M)	rate (M/h)	rate/[B]β
order in B	0	0	1	0.6	0.212598	0.212598	0	1	0.8	0.282908	0.282908
		0.89	0.849	0.449	0.135	0.135	0.33	0.915	0.715	0.232	0.232
		2.03	0.727	0.327	0.085	0.085	1	0.785	0.585	0.163	0.163
		3.89	0.61	0.211	0.046	0.046	1.92	0.662	0.462	0.109	0.109
		6.61	0.522	0.122	0.023	0.023	3.08	0.56	0.36	0.072	0.072
		10	0.467	0.067	0.011	0.011	4.38	0.483	0.283	0.049	0.049
		14.03	0.435	0.035	0.005	0.005	6.29	0.409	0.209	0.031	0.031
		18.36	0.418	0.018	0.003	0.003	11.54	0.308	0.108	0.012	0.012
		22.97	0.409	0.009	0.001	0.001	22.92	0.237	0.037	0.003	0.003
		27.78	0.405	0.005	0.001	0.001	41.67	0.208	0.008	0.001	0.001

## Sheet: order in B (red-green)
		[A]o	1.0 M				[A]o	0.6 M
		[B]o	0.6 M				[B]o	0.6 M
		[cat]o	0.01 M				[cat]o	0.01 M
		Experiment 1					Experiment 2
		t (h)	[A] (M)	[B] (M)	rate (M/h)	rate/[B]β	t (h)	[A] (M)	[B] (M)	rate (M/h)	rate/[B]β
order in B	0	0	1	0.6	0.212598	0.212598	0	0.6	0.6	0.128063	0.128063
		0.89	0.849	0.449	0.135	0.135	0.67	0.525	0.525	0.098	0.098
		2.03	0.727	0.327	0.085	0.085	2.67	0.382	0.382	0.052	0.052
		3.89	0.61	0.211	0.046	0.046	5.67	0.271	0.271	0.026	0.026
		6.61	0.522	0.122	0.023	0.023	12.11	0.167	0.167	0.01	0.01
		10	0.467	0.067	0.011	0.011	19.11	0.117	0.117	0.005	0.005
		14.03	0.435	0.035	0.005	0.005	25.22	0.093	0.093	0.003	0.003
		18.36	0.418	0.018	0.003	0.003	46.89	0.054	0.054	0.001	0.001
		22.97	0.409	0.009	0.001	0.001	89.22	0.03	0.03	0	0
		27.78	0.405	0.005	0.001	0.001	111.11	0.024	0.024	0	0

## Sheet: order in cat (B)
		[A]o	1.0 M				[A]o	1.0 M
		[B]o	0.6 M				[B]o	0.6 M
		[cat]o	0.01 M				[cat]o	0.03 M
		Experiment 1					Experiment 4
		t (h)	[B] (M)	[cat] (M)	rate (M/h)	rate/[cat]γ	t (h)	[B] (M)	[cat] (M)	rate (M/h)	rate/[cat]γ
		0	0.6	0.01	0.212598	0.212598	0	0.6	0.03	0.637795	0.637795
order in cat	0	0.89	0.449	0.01	0.135	0.135	0.13	0.525	0.03	0.517	0.517
		2.03	0.327	0.01	0.085	0.085	0.47	0.386	0.03	0.324	0.324
		3.89	0.211	0.01	0.046	0.046	0.93	0.271	0.03	0.194	0.194
		6.61	0.122	0.01	0.023	0.023	1.68	0.165	0.03	0.1	0.1
		10	0.067	0.01	0.011	0.011	2.85	0.086	0.03	0.045	0.045
		14.03	0.035	0.01	0.005	0.005	3.94	0.05	0.03	0.024	0.024
		18.36	0.018	0.01	0.003	0.003	5.5	0.024	0.03	0.011	0.011
		22.97	0.009	0.01	0.001	0.001	7	0.012	0.03	0.005	0.005
		27.78	0.005	0.01	0.001	0.001	8.33	0.007	0.03	0.003	0.003

## Sheet: order in cat (A)
		[A]o	1.0 M				[A]o	1.0 M
		[B]o	0.6 M				[B]o	0.6 M
		[cat]o	0.01 M				[cat]o	0.03 M
		Experiment 1					Experiment 4
		t (h)	[A] (M)	[cat] (M)	rate (M/h)	rate/[cat]γ	t (h)	[A] (M)	[cat] (M)	rate (M/h)	rate/[cat]γ
		0	1	0.01	0.212598	0.212598	0	1	0.03	0.637795	0.637795
order in cat	0	0.89	0.849	0.01	0.135	0.135	0.13	0.925	0.03	0.517	0.517
		2.03	0.727	0.01	0.085	0.085	0.47	0.786	0.03	0.324	0.324
		3.89	0.61	0.01	0.046	0.046	0.93	0.67	0.03	0.194	0.194
		6.61	0.522	0.01	0.023	0.023	1.68	0.565	0.03	0.1	0.1
		10	0.467	0.01	0.011	0.011	2.85	0.486	0.03	0.045	0.045
		14.03	0.435	0.01	0.005	0.005	3.94	0.45	0.03	0.024	0.024
		18.36	0.418	0.01	0.003	0.003	5.5	0.424	0.03	0.011	0.011
		22.97	0.409	0.01	0.001	0.001	7	0.412	0.03	0.005	0.005
		27.78	0.405	0.01	0.001	0.001	8.33	0.407	0.03	0.003	0.003

## Sheet: kobs
		[A]o	1.0 M						[A]o	0.6 M						[A]o	1.0 M						[A]o	1.0 M
		[B]o	0.6 M						[B]o	0.6 M						[B]o	0.8 M						[B]o	0.6 M
		[cat]o	0.01 M						[cat]o	0.01 M						[cat]o	0.01 M						[cat]o	0.03 M
		Experiment 1							Experiment 2							Experiment 3							Experiment 4
order in A	0.5	t (h)	[A] (M)	[B] (M)	[B]β	[cat] (M)	rate (M/h)	rate/[A]α[cat]γ	t (h)	[A] (M)	[B] (M)	[B]β	[cat] (M)	rate (M/h)	rate/[A]α[cat]γ	t (h)	[A] (M)	[B] (M)	[B]β	[cat] (M)	rate (M/h)	rate/[A]α[cat]γ	t (h)	[A] (M)	[B] (M)	[B]β	[cat] (M)	rate (M/h)	rate/[A]α[cat]γ
order in B	0.5	0	1	0.6	0.774597	0.01	0.213	2.13	0	0.6	0.6	0.774597	0.01	0.128	1.65247	0	1	0.8	0.894427	0.01	0.283	2.83	0	1	0.6	1.2	0.03	0.638	3.68349			rate/[A]α[cat]γ	[B]β
order in cat	0.5	0.89	0.849	0.449	0.670075	0.01	0.135	1.46514	0.67	0.525	0.525	0.724569	0.01	0.098	1.35253	0.33	0.915	0.715	0.845577	0.01	0.232	2.42537	0.13	0.925	0.525	1.05	0.03	0.517	3.10355			2.13	0.774597
		2.03	0.727	0.327	0.571839	0.01	0.085	0.9969	2.67	0.382	0.382	0.618061	0.01	0.052	0.84134	1	0.785	0.585	0.764853	0.01	0.163	1.83972	0.47	0.786	0.386	0.772	0.03	0.324	2.10995			1.46514	0.670075
		3.89	0.61	0.211	0.459347	0.01	0.046	0.58897	5.67	0.271	0.271	0.520577	0.01	0.026	0.499446	1.92	0.662	0.462	0.679706	0.01	0.109	1.33967	0.93	0.67	0.271	0.542	0.03	0.194	1.36837			0.9969	0.571839
		6.61	0.522	0.122	0.349285	0.01	0.023	0.318341	12.11	0.167	0.167	0.408656	0.01	0.01	0.244704	3.08	0.56	0.36	0.6	0.01	0.072	0.96214	1.68	0.565	0.165	0.33	0.03	0.1	0.768095			0.58897	0.459347
		10	0.467	0.067	0.258844	0.01	0.011	0.160966	19.11	0.117	0.117	0.342053	0.01	0.005	0.146176	4.38	0.483	0.283	0.531977	0.01	0.049	0.705054	2.85	0.486	0.086	0.172	0.03	0.045	0.372678			0.318341	0.349285
		14.03	0.435	0.035	0.187083	0.01	0.005	0.0758098	25.22	0.093	0.093	0.304959	0.01	0.003	0.0983739	6.29	0.409	0.209	0.457165	0.01	0.031	0.48473	3.94	0.45	0.05	0.1	0.03	0.024	0.206559			0.160966	0.258844
		18.36	0.418	0.018	0.134164	0.01	0.003	0.0464016	46.89	0.054	0.054	0.232379	0.01	0.001	0.0430331	11.54	0.308	0.108	0.328634	0.01	0.012	0.216225	5.5	0.424	0.024	0.048	0.03	0.011	0.0975324			0.0758098	0.187083
		22.97	0.409	0.009	0.0948683	0.01	0.001	0.0156365	89.22	0.03	0.03	0.173205	0.01	0	0	22.92	0.237	0.037	0.192354	0.01	0.003	0.0616236	7	0.412	0.012	0.024	0.03	0.005	0.0449739			0.0464016	0.134164
		27.78	0.405	0.005	0.0707107	0.01	0.001	0.0157135	111.11	0.024	0.024	0.154919	0.01	0	0	41.67	0.208	0.008	0.0894427	0.01	0.001	0.0219265	8.33	0.407	0.007	0.014	0.03	0.003	0.0271496			0.0156365	0.0948683
																																0.0157135	0.0707107
																																1.65247	0.774597
																																1.35253	0.724569
																																0.84134	0.618061
																																0.499446	0.520577
																																0.244704	0.408656
																																0.146176	0.342053
																																0.0983739	0.304959
																																0.0430331	0.232379
																																0	0.173205
																																0	0.154919
																																2.83	0.894427
																																2.42537	0.845577
																																1.83972	0.764853
																																1.33967	0.679706
																																0.96214	0.6
																																0.705054	0.531977
				SLOPE	3																											0.48473	0.457165
				R2	0.87																											0.216225	0.328634
																																0.0616236	0.192354
																																0.0219265	0.0894427
																																3.68349	1.2
																																3.10355	1.05
																																2.10995	0.772
																																1.36837	0.542
																																0.768095	0.33
																																0.372678	0.172
																																0.206559	0.1
																																0.0975324	0.048
																																0.0449739	0.024
																																0.0271496	0.014
